# Supplementary material for: Technical note: Displacement variance of a solute particle in heterogeneous confined aquifers with random aquifer thickness fields
Source: Copernicus journal article supplement (doi:10.5194/hess-2022-298), 2022-10-17
Supplement: Supplementary file [file hess-2022-298-AC5-supplement.pdf]

**Technical note: Displacement variance of a solute particle in heterogeneous confined aquifers with random aquifer thickness fields**

**Ching-Min Chang<sup>1</sup>, Chuen-Fa Ni<sup>1</sup>, Chi-Ping Lin<sup>2</sup>, and I-Hsien Lee<sup>2</sup>**

<sup>1</sup>Graduate Institute of Applied Geology, National Central University, Taoyuan, Taiwan

<sup>2</sup>Center for Environmental Studies, National Central University, Taoyuan, Taiwan

**Correspondence:** Chuen-Fa Ni ([nichuenfa@geo.ncu.edu.tw](mailto:nichuenfa@geo.ncu.edu.tw))

1 **Abstract.**

2 In this work, the variability of regional-scale transport of inert solutes in  
3 heterogeneous confined aquifers of variable thickness is quantified by the variance of  
4 the displacement of a solute particle. Variability in solute displacement is attributed to  
5 variability in hydraulic conductivity and aquifer thickness. A general stochastic  
6 methodology for deriving the variance of the displacement of a solute particle based  
7 on the convection velocity of solute particles, developed from the relationship  
8 between the two-dimensional depth-averaged solute mass conservation equation and  
9 the Fokker-Planck equation, is given. Explicit results for the solute displacement  
10 variance in the mean flow direction for the case of advection-dominated solute  
11 transport are obtained assuming that the fluctuations in log hydraulic conductivity and  
12 log thickness of the confined aquifer are second-order stationary processes. The  
13 results show that variation in hydraulic conductivity and aquifer thickness can  
14 lead to nonstationarity in the covariance of flow velocity, making longitudinal  
15 macrodispersion anomalous and increasing linearly with travel time at large  
16 distances.

17

18 **1 Introduction**

19

20 It is widely accepted that the variability of solute movement in heterogeneous  
21 aquifers is controlled primarily by the spatial variability of groundwater flow  
22 fields (e.g., Dagan, 1989; Gelhar, 1993; Rubin, 2003). Much work on the  
23 stochastic analysis of solute transport in heterogeneous porous formations has  
24 focused on relating the spatial variability of the hydraulic conductivity field to  
25 that of the flow velocity field, and thus to the spatial variability of the  
26 displacement of a solute particle. However, natural aquifers at regional scales often  
27 exhibit nonuniform aquifer thickness (e.g., Masterson et al., 2013; Zamrsky et al.,  
28 2018; DeSimone et al., 2020), and spatial variability in the aquifer thickness field has  
29 also been shown to have an important influence on flow field variability (e.g.,  
30 Hantush, 1962; Cuello and Guarracino, 2020; Chang et al., 2021). Thus, the  
31 underlying motivation for this work is to provide an analytical stochastic method for  
32 improved quantification of the variability of solute displacement at the regional scale  
33 in heterogeneous aquifers under more realistic field conditions, i.e., taking into  
34 account the effects not only of the spatial variation of the hydraulic conductivity field  
35 but also of the thickness field of the confined aquifer.

36 At a regional scale, the lateral extent of the confined aquifer is much greater than  
37 the thickness of the formation. Therefore, it is more practical to view the flow and  
38 solute transport processes in confined aquifers at the regional scale as essentially

39 two-dimensional, areal processes. In the traditional approach to the essentially  
40 horizontal flow, the stochastic description of flow and solute transport processes is  
41 related to the stochastic properties of transmissivity (e.g., Dagan, 1982; 1984), where  
42 the transmissivity is the line integration of hydraulic conductivity over the depth of  
43 the formation at a given point. However, in reality, transmissivity measurements from  
44 field tests give a value of integrated hydraulic conductivity over a larger volume than  
45 the range used for the line integration of hydraulic conductivity at a single point. This  
46 means that the field tests performed for the transmissivity measurements include more  
47 of the heterogeneity in the formation than that encountered over the depth of the  
48 formation at a single point. This would result in a reduction in the variance of  
49 transmissivity and an overestimation of the integral scale of transmissivity compared  
50 to values predicted from the line integration of hydraulic conductivity. Consequently,  
51 using the stochastic properties of transmissivity may not provide an accurate  
52 interpretation of solute movement at a regional scale.

53       Rather than using the stochastic properties of transmissivity, this work uses the  
54 stochastic properties of hydraulic conductivity and thickness of the confined  
55 aquifer to interpret the variability of solute movement at a regional scale using a  
56 hydraulic approach (or essentially horizontal flow approach) (Bear, 1979; Bear  
57 and Cheng, 2010). That is, in this approach, the variability in solute movement is

58 due to variations in hydraulic conductivity and aquifer thickness.

59 The traditional approach to regional groundwater flow problems introduces the  
60 transmissivity parameter to describe the ability of a confined aquifer to transmit water  
61 throughout its saturated thickness. The effect of the thickness of the aquifer is  
62 implicitly reflected in the transmissivity parameter. It is very difficult to assess the  
63 effect of thickness on the flow field and thus on solute transport at a regional scale.  
64 The stochastic approach presented here provides an efficient and rational way to  
65 analyze flow and solute transport fields affected by the non-uniform thickness of  
66 confined aquifers, which has not been previously presented in the literature. This  
67 work shows that variability in aquifer thickness can lead to nonstationarity in  
68 hydraulic head fields and thus to nonstationary flow velocity fields and anomalous  
69 longitudinal dispersion. This implies that neglecting the variability of aquifer  
70 thickness when predicting the longitudinal displacement of solutes at large times can  
71 lead to a significant underestimation of longitudinal dispersion. The stochastic theory  
72 presented here improves quantification of the variance of the solute displacement in  
73 natural confined aquifers of random thickness fields.

74 In the present work, the convection velocity of solute particles is first developed  
75 based on the relationship between the two-dimensional depth-averaged solute mass  
76 conservation equation and the Fokker-Planck equation, so that the convection velocity

77 can explicitly reflect the effects of hydraulic conductivity and aquifer thickness. Using  
78 the perturbation approach to solute convection velocity, the covariance function of  
79 solute convection velocity is then developed, which allows a general expression for  
80 the variance of the displacement of a solute particle in the mean flow direction to be  
81 developed. A closed-form expression for the solute displacement variance is also  
82 developed for the case where solute transport is dominated by advection and the  
83 random fields of log conductivity and log thickness of the confined aquifer are  
84 second-order stationary. Finally, the influence of variations in log hydraulic  
85 conductivity and log aquifer thickness on the variability of solution displacement is  
86 analyzed.

87

## 88 **2 Mathematical formulation of the problem**

89

90 Consider here the steady flow of a fluid carrying an inert solute through a  
91 heterogeneous confined aquifer with variable thickness. When constituents are well  
92 mixed throughout the thickness of the aquifer (depth of flow) and fluid flow through  
93 an aquifer occurs on a regional scale, with the lateral extent of the formation much  
94 greater than the thickness of the formation, it is appropriate to view the flow and solute  
95 transport processes as essentially two-dimensional. In this work, the two-dimensional

96 solute transport process in heterogeneous confined aquifers is quantified by using  
 97 moments of solute particle displacement in the Lagrangian framework (e.g., Dagan,  
 98 1982; 1984), where the particle displacement can be defined as

$$99 \quad \frac{d\mathbf{X}}{dt} = \mathbf{V}_c \quad (1)$$

100 In Eq. (1),  $\mathbf{X}$  ( $= (X_1, X_2)$ ) is the displacement and  $\mathbf{V}_c$  ( $= (V_{c1}, V_{c2})$ ) is the convection  
 101 velocity of the solute particle.

102 The displacement of the solute particles in Eq. (1) consists of two components:  
 103 one originates from convection through the fluid and the other is associated with the  
 104 transport process at the pore scale. This means that the statistical moments of particle  
 105 displacement cannot be determined directly from the statistical moments of flow  
 106 velocity. The convection velocity of the solute particle in Eq. (1) can be obtained from  
 107 the relationship between the two-dimensional depth-averaged equation for the  
 108 conservation of solute mass and the Fokker-Planck equation as follows:

$$109 \quad \frac{dX_i}{dt} = \frac{1}{n} \tilde{q}_i(\mathbf{X}) + \left[ \frac{1}{n} \tilde{D}_i(\mathbf{X}) \frac{\partial}{\partial x_i} \ln B(\mathbf{X}) + \frac{1}{n} \frac{\partial}{\partial x_i} \tilde{D}_i(\mathbf{X}) \right] + \sqrt{\frac{2}{n} \tilde{D}_i(\mathbf{X})} \frac{dW}{dt} \quad i=1,2. \quad (2)$$

110 where  $n$  is the porosity,  $\tilde{D}_i$ , and  $\tilde{q}_i$  represent the depth-averaged dispersion  
 111 coefficient and depth-averaged specific discharge in the  $x_i$  direction, respectively,  $B$  is  
 112 the thickness of a confined aquifer, and  $W$  denotes a Wiener process. The details of the  
 113 development of Eq. (2) are given in Appendix A.

114 From the right-hand side of Eq. (2), it can be seen that the first term represents the

115 convection velocity of the flow, the second and third terms are associated with  
 116 pore-scale dispersion, which includes the effects of local heterogeneity of aquifer  
 117 thickness and dispersion coefficient, respectively, and the last term is associated with a  
 118 Brownian motion type diffusion process. Equation (2) provides a basic basis for  
 119 evaluating the statistical moments of solute particle displacement.

120 In this study, the fields (or processes) of hydraulic conductivity  $K(x_1, x_2)$  and  
 121 thickness of the confined aquifer  $B(x_1, x_2)$  are considered spatially random, and  
 122 therefore a random flow field and a random particle displacement field. It is also  
 123 assumed that the mean fluid flow is uniform and unidirectional in the  $x_1$ -direction (i.e.,  
 124  $\langle \mathbf{X} \rangle = (\langle X_1 \rangle, 0)$ ) and that the spatial variation of the depth-averaged dispersion  
 125 coefficients and the Brownian motion type diffusion process are negligible. This  
 126 simplifies Eq. (2) to

$$127 \quad \frac{dX_i}{dt} = \frac{1}{n} \tilde{q}_i(\mathbf{X}) + \frac{1}{n} \tilde{D}_i \frac{\partial}{\partial x_i} \ln B(\mathbf{X}) \quad i=1,2. \quad (3)$$

128 Note that the assumption of uniform mean flow in the  $x_1$ -direction implies that the  
 129 gradient of the mean depth-averaged hydraulic head is constant in the  $x_1$ -direction and  
 130 zero in the  $x_2$ -direction (Chang et al. 2021).

131 By analogy with Butera and Tanda (1999), extending Eq. (3) in Taylor series  
 132 around  $\langle \mathbf{X} \rangle$  in the  $x_1$ -direction yields

$$133 \quad \frac{dX_1}{dt} = \frac{1}{n} \tilde{D}_1 \left[ \frac{\partial \Phi(\langle X_1 \rangle, 0)}{\partial x_1} + \frac{d^2 \Phi(\langle X_1 \rangle, 0)}{dx_1^2} X_1 + \frac{d\beta(\langle X_1 \rangle, 0)}{dx_1} \right] + \langle \tilde{v}_1 \rangle + v_1(\langle X_1 \rangle, 0), \quad (4)$$



134 where  $X_1' = X_1 - \langle X_1 \rangle$ ,  $\Phi = \langle \ln B \rangle$ ,  $\beta = \ln B - \langle \ln B \rangle$ ,  $v_1 = \tilde{v}_1 - \langle \tilde{v}_1 \rangle$ ,  $\langle \tilde{v}_1 \rangle = \text{constant}$ ,  
 135 and  $\tilde{v}_1 = \tilde{q}_1 / n$ . Note that due to the assumption of uniform mean flow in the  
 136  $x_1$ -direction, the term  $\frac{d\langle \tilde{v}_1 \rangle}{dx_1} X_1'$  has been removed from Eq. (4). Equation (4) reveals

137 that

$$138 \quad \frac{d\langle X_1 \rangle}{dt} = \frac{1}{n} \tilde{D}_1 \frac{d\Phi(\langle X_1 \rangle, 0)}{dx_1} + \langle \tilde{v}_1 \rangle, \quad (5a)$$

$$139 \quad \frac{dX_1'}{dt} - \frac{\tilde{D}_1}{n} \frac{d^2\Phi(\langle X_1 \rangle, 0)}{dx_1^2} X_1' = \frac{\tilde{D}_1}{n} \frac{d\beta(\langle X_1 \rangle, 0)}{dx_1} + v_1(\langle X_1 \rangle, 0). \quad (5b)$$

140 Equations (5a) and (5b) describe the mean and fluctuation, respectively, of the  
 141 displacement of the solute particles. By the solution of Eq. (5), the variance of the  
 142 solute displacement in the  $x_1$ -direction (the mean flow direction) can be evaluated in  
 143 the frame, (e.g., Dagan, 1984; 1989)

$$144 \quad X_{11}(t) = \langle X_1'(t) X_1'(t) \rangle. \quad (6)$$

145 It is important to recognize the validity of the assumption of a first order  
 146 perturbation of  $X_1$ . The first-order approximation for representing the depth-averaged  
 147 hydraulic head perturbation, and hence the solute displacement perturbation, should  
 148 be applied to porous formations where the standard deviation of the random  
 149 fluctuations of the log hydraulic conductivity is less than 1. However, Zhang and  
 150 Winter (1999) report in a Monte Carlo simulation study that it is accurate for the  
 151 solutions of the head moment for the value of the variance of the log conductivity of  
 152 up to 4.38. A similar finding from comparing moments of hydraulic head with results

153 of numerical Monte Carlo simulations is also reported in Guadagnini and Neuman  
 154 (1999) for highly heterogeneous media with a variance of log conductivity from 2 to  
 155 4.

156 In the case where the thickness of the aquifer is a slowly spatially varying process  
 157 (e.g., a second-order stationary process), the terms  $d\Phi/dx_1$  and  $d^2\Phi/dx_1^2$  in Eq. (5) may  
 158 be neglected, and, consequently, Eq. (5) reduces to

$$159 \quad \frac{d\langle X_1 \rangle}{dt} = \langle \tilde{v}_1 \rangle, \quad (7a)$$

$$160 \quad \frac{dX_1'}{dt} = \frac{\tilde{D}_1}{n} \frac{d\beta(\langle X_1 \rangle, 0)}{dx_1} + v_1(\langle X_1 \rangle, 0). \quad (7b)$$

161 Equation (7b) implies that the variability of the particle displacement is determined by  
 162 the gradient of the variation of the aquifer thickness fields and the variability of the  
 163 flow velocity. Note that when flowing through a confined aquifer with variable  
 164 thickness, the variability in flow velocity is influenced by both the variation in log  
 165 conductivity and log thickness fields (Chang et al., 2021). This means that the  
 166 variability of  $v_1$  in Eq. (7b) depends on both the variation of log conductivity and log  
 167 aquifer thickness.

168 Using the solution of Eq. (7),

$$169 \quad X_1'(t) = \int_0^t \left[ \frac{\tilde{D}_1}{n} \frac{d\beta}{dx_1}(\langle \tilde{v}_1 \rangle s, 0) + v_1(\langle \tilde{v}_1 \rangle s, 0) \right] ds, \quad (8)$$

170 the variance of the solute displacement in the mean flow direction in Eq. (6) results in

$$\begin{aligned}
171 \quad x_{11}(t) = & \int_0^t \int_0^t \left[ \frac{\tilde{D}_1^2}{n^2} \left\langle \frac{\partial \beta(\xi)}{\partial \xi_1} \right|_{\ell_1} \frac{\partial \beta(\zeta)}{\partial \zeta_1} \right|_{\ell_2} + \frac{\tilde{D}_1}{n} \left\langle \frac{\partial \beta(\xi)}{\partial \xi_1} \right|_{\ell_1} v_1(\zeta) \right|_{\ell_2} \rangle \\
172 \quad & + \frac{\tilde{D}_1}{n} \left\langle v_1(\xi) \right|_{\ell_1} \frac{\partial \beta(\zeta)}{\partial \zeta_1} \right|_{\ell_2} \rangle + \left\langle v_1(\xi) \right|_{\ell_1} v_1(\zeta) \right|_{\ell_2} \rangle \Big] ds_1 ds_2, \quad (9)
\end{aligned}$$

173 where  $\xi = (\xi_1, \xi_2)$ ,  $\zeta = (\zeta_1, \zeta_2)$ ,  $\ell_1 = (\langle \tilde{v}_1 \rangle_{s_1}, 0)$ , and  $\ell_2 = (\langle \tilde{v}_1 \rangle_{s_2}, 0)$ . To arrive at Eq.  
174 (9), the solute particle was assumed to begin its motion at location  $x_1 = 0$  and time  $t =$   
175 0.

176 To proceed with the evaluation of solute displacement in the  $x_1$  direction, the  
177 following section develops the statistics of the flow fields in Eq. (9) for the case  
178 where both the variations in hydraulic conductivity and the thickness of the confined  
179 aquifer are considered to be second-order stationary processes and the random  
180 processes of hydraulic conductivity and aquifer thickness are statistically independent.

181

### 182 **3 Statistics of the flow fields**

183

184 Chang et al. (2021) develop the differential equations for the flow fields (Eqs. (6) and  
185 (12) of Chang et al., 2021) in a confined aquifer with variable thickness based on a  
186 hydraulic approach to flow in aquifers (Bear, 1979; Bear and Cheng, 2010). On this  
187 basis, under the condition of steady-state flow, the equation for the depth-averaged  
188 specific discharge about the mean, keeping only first-order terms in the perturbations,  
189 take the following form

190  $q_i = \bar{q}[(y + \beta)\delta_{ii} - \frac{1}{J} \frac{\partial h}{\partial x_i}] \quad i=1,2, \quad (10a)$

191 where  $h = \tilde{h} - \langle \tilde{h} \rangle$ ,  $\tilde{h}$  is the depth-averaged hydraulic head,  $J = -d \langle \tilde{h} \rangle / dx_i$  (=

192 constant),  $y = \ln K - Y$ ,  $K$  is the hydraulic conductivity,  $Y = \langle \ln K \rangle$ ,  $q_i = \tilde{q}_i - \langle \tilde{q}_i \rangle$ ,

193  $\bar{q} = \langle \tilde{q}_i \rangle = e^Y J$ , and the equation describing the depth-averaged head perturbation is

194 of the form

195  $\frac{\partial^2 h}{\partial x_i^2} = J \left[ \frac{\partial y}{\partial x_1} + 2 \frac{\partial \beta}{\partial x_1} \right] \quad i=1,2. \quad (10b)$

196 Equation (10) shows that the variations in log-hydraulic conductivity and log-aquifer

197 thickness appear as forcing terms that produce the variations in depth-averaged head

198 and hence the variations in depth-averaged specific discharge.

199 It follows from Eq. (10) that the terms for the statistics of the flow fields in Eq. (9),

200 such as the covariance function for the log-aquifer thickness gradient, the

201 cross-correlation between the log-aquifer thickness gradient and the depth-averaged

202 flow velocity, and the covariance function for the depth-averaged flow velocity

203 process, can be evaluated using the spectral representation theorem as follows:

204  $\left\langle \frac{\partial \beta(\xi)}{\partial \xi_1} \frac{\partial \beta(\zeta)}{\partial \zeta_1} \right\rangle = \frac{\partial^2}{\partial \xi_1 \partial \zeta_1} C_{\beta\beta}(\xi, \zeta), \quad (11)$

205  $\left\langle \frac{\partial \beta(\xi)}{\partial \xi_1} v_1(\zeta) \right\rangle = VJ \frac{\partial}{\partial \xi_1} C_{\beta\beta}(\xi, \zeta) - V \frac{\partial^2}{\partial \xi_1 \partial \zeta_1} C_{\beta h_p}(\xi, \zeta), \quad (12a)$

206  $\left\langle v_1(\xi) \frac{\partial \beta(\zeta)}{\partial \zeta_1} \right\rangle = VJ \frac{\partial}{\partial \zeta_1} C_{\beta\beta}(\xi, \zeta) - V \frac{\partial^2}{\partial \xi_1 \partial \zeta_1} C_{\beta h_p}(\xi, \zeta), \quad (12b)$

207  $\frac{\langle v_i(\xi) v_j(\zeta) \rangle}{V^2} = [C_{yy}(\xi, \zeta) + C_{\beta\beta}(\xi, \zeta)] \delta_{ii} \delta_{1j} - \frac{1}{J} \frac{\partial}{\partial \zeta_j} [C_{yh_y}(\xi, \zeta) + C_{\beta h_p}(\xi, \zeta)] \delta_{ii}$   
 208  $- \frac{1}{J} \frac{\partial}{\partial \xi_i} [C_{yh_y}(\xi, \zeta) + C_{\beta h_p}(\xi, \zeta)] \delta_{1j} - \frac{1}{J^2} \frac{\partial \gamma_h(\xi, \zeta)}{\partial \xi_i \partial \zeta_j}, \quad (13)$

209 where  $V = \bar{q} / n = e^Y J / n$ ,  $C_{yy}$  and  $C_{\beta\beta}$  are the  $\ln K$  and  $\ln B$  covariance functions,  
 210 respectively,  $C_{yh_y}$  is the covariance of  $\ln K$  process with the head process,  $C_{\beta h_\beta}$  is the  
 211 covariance of  $\ln B$  process with the head process, and  $\gamma_h$  is the semivariogram of the  
 212 head process, defined as

$$213 \quad \gamma_h(\xi, \zeta) = \gamma_{h_y}(\xi, \zeta) + \gamma_{h_\beta}(\xi, \zeta) = \frac{1}{2} \left\{ \langle [h_y(\xi) - h_y(\zeta)]^2 \rangle + \langle [h_\beta(\xi) - h_\beta(\zeta)]^2 \rangle \right\}. \quad (14)$$

214 Note that  $C_{yh_y}$ ,  $C_{\beta h_\beta}$  and  $\gamma_h$  in Eqs. (12) and (13) can be calculated using the  
 215 representation theorem for the depth-averaged head perturbation  $h$  (the perturbation  
 216 solution of equation (10b)).

217

## 218 **4 Results and discussion**

219

220 To simplify the analysis of the variation of log-aquifer thickness on the variability of  
 221 the solute displacement, this study considers the case where the local dispersivity is  
 222 very small compared to the integral scales for the  $\ln K$  and  $\ln B$  processes, so that the  
 223 solute dispersion is mainly caused by the spatial variability of hydraulic conductivity  
 224 and thickness of confined aquifer. That is, solute dispersion occurs in situations where  
 225 advection dominates and solute particles do not transfer across streamlines. Therefore,  
 226 Eq. (9) can be simplified to

$$227 \quad X_{11}(t) = \int_0^t \int_0^t \langle v_1(\xi) \Big|_{\ell_1} v_1(\zeta) \Big|_{\ell_2} \rangle ds_1 ds_2. \quad (15)$$

228 That is, the variance of the solute displacement in the mean flow direction can only be  
 229 determined with Eqs. (15) and (13). There are numerous studies in the literature on  
 230 solute transport under advection-dominated conditions, e.g., Dagan (1984), Rubin and  
 231 Bellin (1994), Butera et al. (2009), Cvetkovic (2016), Ciriello and Barros (2020), etc.

232 To determine the covariance function of the depth-averaged flow velocity, and  
 233 thus the variance of solute displacement, it is assumed that the hydraulic conductivity  
 234 and the thickness of the aquifer fields are lognormally distributed and characterized by  
 235 the isotropic exponential covariance, i.e. (e.g., Dagan, 1984; Gelhar, 1993; Bailey and  
 236 Baù, 2012)

$$237 \quad C_{yy}(\xi, \zeta) = \sigma_y^2 \exp\left[-\frac{|\xi - \zeta|}{\lambda_y}\right], \quad (16a)$$

$$238 \quad C_{\beta\beta}(\xi, \zeta) = \sigma_\beta^2 \exp\left[-\frac{|\xi - \zeta|}{\lambda_\beta}\right], \quad (16b)$$

239 where  $\sigma_y^2$  and  $\sigma_\beta^2$  are the variances of  $y$  and  $\beta$ , respectively,  $\lambda_y$  and  $\lambda_\beta$  are the integral  
 240 scales of  $\ln K$  and  $\ln B$  fields, respectively. The corresponding spectra, which result  
 241 from the inverse Fourier transform of Eq. (16), are as follows:

$$242 \quad S_{yy}(R_1, R_2) = \frac{\sigma_y^2 \lambda_y^2}{2\pi [1 + \lambda_y^2 (R_1^2 + R_2^2)]^{3/2}}, \quad (17a)$$

$$243 \quad S_{\beta\beta}(R_1, R_2) = \frac{\sigma_\beta^2 \lambda_\beta^2}{2\pi [1 + \lambda_\beta^2 (R_1^2 + R_2^2)]^{3/2}}. \quad (17b)$$

244

#### 245 4.1 Covariance of flow velocity in the $x_1$ -direction

246

247 Once the spectrum forms of the  $\ln K$  and  $\ln B$  fields are selected, the cross-correlation  
 248 between the  $\ln K$  perturbation and the perturbation in the depth-averaged head,  $C_{yh_y}$ , the  
 249 cross-correlation between the  $\ln B$  perturbation and the perturbation in the  
 250 depth-averaged head,  $C_{\beta h_\beta}$ , and the semivariogram of the depth-averaged process,  $\gamma_h$ ,  
 251 can be determined as follows:

$$252 \quad C_{yh_y}(\xi, \zeta) = \sigma_y^2 \lambda_y J \left[ \Theta_1 \left( \frac{\xi_1}{\lambda_y}, \frac{\zeta_1}{\lambda_y} \right) - \frac{\zeta_1}{\lambda_y} \Theta_2 \left( \frac{\xi_1}{\lambda_y}, \frac{\zeta_1}{\lambda_y} \right) + \frac{\zeta_2}{\lambda_y} \Theta_3 \left( \frac{\xi_1}{\lambda_y}, \frac{\zeta_2}{\lambda_y} \right) - \Theta_1 \left( \frac{\rho_1}{\lambda_y}, \frac{\rho_2}{\lambda_y} \right) \right], \quad (18)$$

$$253 \quad C_{\beta h_\beta}(\xi, \zeta) = 2\sigma_y^2 \lambda_\beta J \left[ \Theta_1 \left( \frac{\xi_1}{\lambda_\beta}, \frac{\zeta_1}{\lambda_\beta} \right) - \frac{\zeta_1}{\lambda_\beta} \Theta_2 \left( \frac{\xi_1}{\lambda_\beta}, \frac{\zeta_1}{\lambda_\beta} \right) + \frac{\zeta_2}{\lambda_\beta} \Theta_3 \left( \frac{\xi_1}{\lambda_\beta}, \frac{\zeta_2}{\lambda_\beta} \right) - \Theta_1 \left( \frac{\rho_1}{\lambda_\beta}, \frac{\rho_2}{\lambda_\beta} \right) \right], \quad (19)$$

$$254 \quad \gamma_h(\xi, \zeta) = \gamma_{h_y}(\xi, \zeta) + \gamma_{h_\beta}(\xi, \zeta), \quad (20a)$$

$$255 \quad \gamma_{h_y}(\xi, \zeta) = \frac{1}{2} \sigma_y^2 \lambda_y^2 J^2 \left\{ \frac{3}{8} \frac{\rho_1^2}{\lambda_y^2} + \frac{1}{8} \frac{\rho_2^2}{\lambda_y^2} + \Psi_1 \left( \frac{\rho_1}{\lambda_y}, \frac{\rho_2}{\lambda_y} \right) + \frac{\rho_1}{\lambda_y} \left[ -\frac{\xi_1}{\lambda_y} \Psi_2 \left( \frac{\xi_1}{\lambda_y}, \frac{\zeta_1}{\lambda_y} \right) + \frac{\zeta_1}{\lambda_y} \Psi_2 \left( \frac{\xi_1}{\lambda_y}, \frac{\zeta_2}{\lambda_y} \right) \right] \right. \\ 256 \quad \left. + \frac{\rho_2}{\lambda_y} \left[ \frac{\xi_2}{\lambda_y} \Psi_3 \left( \frac{\xi_1}{\lambda_y}, \frac{\zeta_2}{\lambda_y} \right) - \frac{\zeta_2}{\lambda_y} \Psi_3 \left( \frac{\xi_1}{\lambda_y}, \frac{\zeta_2}{\lambda_y} \right) \right] \right\}, \quad (20b)$$

$$257 \quad \gamma_{h_\beta}(\xi, \zeta) = 2\sigma_y^2 \lambda_\beta^2 J^2 \left\{ \frac{3}{8} \frac{\rho_1^2}{\lambda_\beta^2} + \frac{1}{8} \frac{\rho_2^2}{\lambda_\beta^2} + \Psi_1 \left( \frac{\rho_1}{\lambda_\beta}, \frac{\rho_2}{\lambda_\beta} \right) + \frac{\rho_1}{\lambda_\beta} \left[ -\frac{\xi_1}{\lambda_\beta} \Psi_2 \left( \frac{\xi_1}{\lambda_\beta}, \frac{\zeta_1}{\lambda_\beta} \right) + \frac{\zeta_1}{\lambda_\beta} \Psi_2 \left( \frac{\xi_1}{\lambda_\beta}, \frac{\zeta_2}{\lambda_\beta} \right) \right] \right. \\ 258 \quad \left. + \frac{\rho_2}{\lambda_\beta} \left[ \frac{\xi_2}{\lambda_\beta} \Psi_3 \left( \frac{\xi_1}{\lambda_\beta}, \frac{\zeta_2}{\lambda_\beta} \right) - \frac{\zeta_2}{\lambda_\beta} \Psi_3 \left( \frac{\xi_1}{\lambda_\beta}, \frac{\zeta_2}{\lambda_\beta} \right) \right] \right\}, \quad (20c)$$

259 where  $\rho_1 = \xi_1 - \zeta_1$ ,  $\rho_2 = \xi_2 - \zeta_2$ , and the description of functions  $\Theta_1$  through  $\Theta_3$ , or  $\Psi_1$   
 260 through  $\Psi_3$ , can be found in Appendix B. Detailed derivations of Eq. (18) to Eq. (20)  
 261 can be found in Appendix B.

262 In the case of statistically nonhomogeneous random fields, the structure of  
 263 variability can be characterized by considering the semivariogram of a random field. If  
 264 the semivariogram depends only on the separation, the random field is said to have

265 stationary increments. The semivariogram in Eq. (20) clearly depends on the spatial  
 266 location, which means that the processes of depth-averaged hydraulic head are  
 267 nonstationary.  
 268

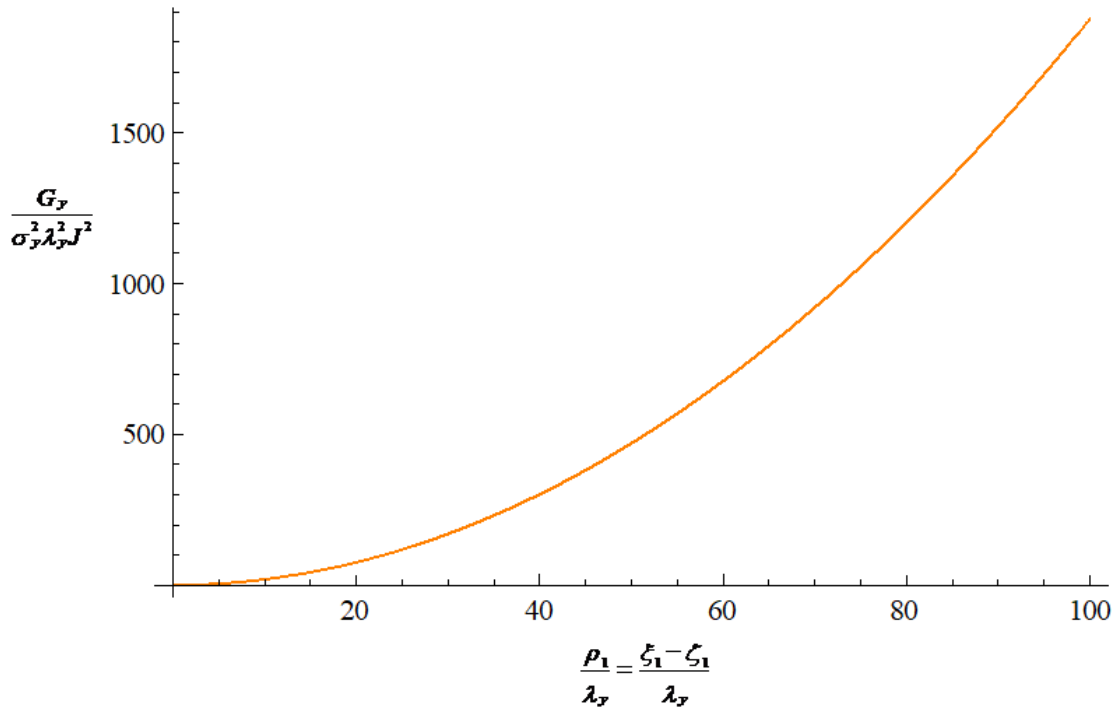

269  
 270 **Figure 1.** The stationary parts of the semivariogram of the head field, reflecting the  
 271 effect of variation in the hydraulic conductivity fields, as a function of the separation  
 272 distance in the mean flow direction, where  $G_y$  is the sum of the first three terms on the  
 273 right-hand side of Eq. (20b).

274  
 275 Figure 1 shows graphically the behavior of the stationary parts of the  
 276 semivariogram (namely, the sum of the first three terms on the right-hand side of Eq.  
 277 (20b)) as a function of the separation distance in the  $x_1$ -direction (mean flow direction).



278 The semivariogram of the head field, reflecting the effect of variation in the hydraulic  
279 conductivity fields, shows an unlimited increase, as shown in Fig. 1. The unbounded  
280 head semivariogram suggests that there is no head covariance function (or the  
281 hydraulic head field with infinite variance). When taking samples from a field, one  
282 obtains a histogram from which a certain value of the variance can always be  
283 calculated. However, for many phenomena, the experimental variance is actually a  
284 function of the field. In particular, it increases as the field increases, i.e., many  
285 phenomena have an almost unlimited capacity of dispersion and cannot be adequately  
286 described by ascribing to them a finite a priori variance. In this case, the use of the  
287 semivariogram is an appropriate way to measure the variability of the variation.  
288 Similar conclusions can be drawn from Fig. 2, a graphical representation of the  
289 stationary parts of the semivariogram of the head field in Eq. (20c) in the mean flow  
290 direction, which reflects the effect of the variation of the aquifer thickness fields.

291 At this point, the covariance function for the depth-averaged velocity process in  
292 Eq. (13) can now be determined in conjunction with Eqs. (16), and (18)-(20). For  
293 example, the covariance of flow velocity for the separation along the mean flow  
294 direction is explicitly determined as follows:

$$295 \quad \langle v_1(\xi_1, \xi_2)v_1(\zeta_1, \zeta_2 = \xi_2) \rangle = \langle v_{y_1}(\xi_1, \xi_2)v_{y_1}(\zeta_1, \xi_2) \rangle + \langle v_{\beta_1}(\xi_1, \xi_2)v_{\beta_1}(\zeta_1, \xi_2) \rangle, \quad (21a)$$

296 where

$$\begin{aligned}
297 \quad \frac{\langle v_{y_1}(\xi_1, \xi_2) v_{y_1}(\zeta_1, \zeta_2) \rangle}{V^2} &= \sigma_y^2 \left\{ \frac{3}{8} + \exp\left(-\frac{\rho}{\lambda_y}\right) - \left[ 2\varepsilon_1\left(\frac{\rho_1}{\lambda_y}, 0\right) - \varepsilon_1\left(\frac{\xi_1}{\lambda_y}, \frac{\xi_2}{\lambda_y}\right) - \varepsilon_1\left(\frac{\zeta_1}{\lambda_y}, \frac{\zeta_2}{\lambda_y}\right) \right] \right. \\
298 \quad &\quad \left. + \left[ \varepsilon_2\left(\frac{\rho_1}{\lambda_y}, 0\right) - \varepsilon_2\left(\frac{\xi_1}{\lambda_y}, \frac{\xi_2}{\lambda_y}\right) - \varepsilon_2\left(\frac{\zeta_1}{\lambda_y}, \frac{\zeta_2}{\lambda_y}\right) \right] \right\}, \quad (21b)
\end{aligned}$$

$$\begin{aligned}
299 \quad \frac{\langle v_{\beta_1}(\xi_1, \xi_2) v_{\beta_1}(\zeta_1, \zeta_2) \rangle}{V^2} &= \sigma_\beta^2 \left\{ \frac{3}{2} + \exp\left(-\frac{\rho}{\lambda_\beta}\right) - 2 \left[ 2\varepsilon_1\left(\frac{\rho_1}{\lambda_\beta}, 0\right) - \varepsilon_1\left(\frac{\xi_1}{\lambda_\beta}, \frac{\xi_2}{\lambda_\beta}\right) - \varepsilon_1\left(\frac{\zeta_1}{\lambda_\beta}, \frac{\zeta_2}{\lambda_\beta}\right) \right] \right. \\
300 \quad &\quad \left. + 4 \left[ \varepsilon_2\left(\frac{\rho_1}{\lambda_\beta}, 0\right) - \varepsilon_2\left(\frac{\xi_1}{\lambda_\beta}, \frac{\xi_2}{\lambda_\beta}\right) - \varepsilon_2\left(\frac{\zeta_1}{\lambda_\beta}, \frac{\zeta_2}{\lambda_\beta}\right) \right] \right\}, \quad (21c)
\end{aligned}$$

301  $\rho = (\rho_1^2 + \rho_2^2)^{1/2}$  and expressions for  $\varepsilon_1$  and  $\varepsilon_2$  are given, respectively, in the Appendix C.

302 This should be used to compute the variance of solute displacement in the mean flow

303 direction. The nonstationarity of the velocity covariance in Eq. (21) is evident in the

304 dependence on spatial location, which is caused by nonstationarity in the hydraulic

305 head processes.

306

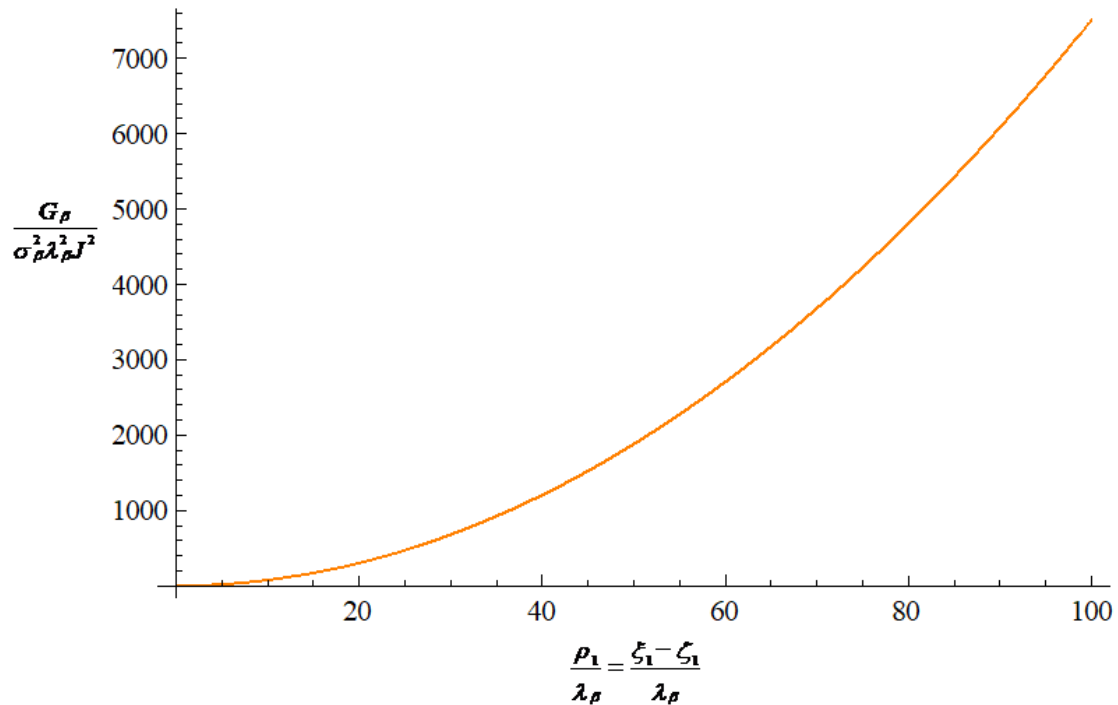

307

308 **Figure 2.** The stationary parts of the semivariogram of the head field, reflecting the

309 effect of the variation of the aquifer thickness fields, as a function of the separation

310 distance in the mean flow direction, where  $G_\beta$  is the sum of the first three terms on the  
 311 right-hand side of Eq. (21c).

312

313 In the limit of  $\zeta_1 \rightarrow \xi_1$ , Eq. (21) approaches to the velocity variances in the mean  
 314 flow direction as

$$315 \quad \sigma_v^2 = \sigma_{v_y}^2(\xi_1, \xi_2) + \sigma_{v_\beta}^2(\xi_1, \xi_2), \quad (22a)$$

316 where

$$317 \quad \frac{\sigma_{v_y}^2}{V^2 \sigma_y^2} = \frac{1}{4} \frac{1}{\xi^8} \Delta_1\left(\frac{\xi_1}{\lambda_y}, \frac{\xi_2}{\lambda_y}\right) + \frac{1}{4} \frac{1}{\xi^9} \exp\left[-\frac{\xi}{\lambda_y}\right] \Delta_2\left(\frac{\xi_1}{\lambda_y}, \frac{\xi_2}{\lambda_y}\right), \quad (22b)$$

$$318 \quad \frac{\sigma_{v_\beta}^2}{V^2 \sigma_\beta^2} = \frac{1}{2} \frac{1}{\xi^8} \Delta_3\left(\frac{\xi_1}{\lambda_\beta}, \frac{\xi_2}{\lambda_y}\right) + \frac{1}{2} \frac{1}{\xi^9} \exp\left[-\frac{\xi}{\lambda_\beta}\right] \Delta_4\left(\frac{\xi_1}{\lambda_\beta}, \frac{\xi_2}{\lambda_\beta}\right), \quad (22c)$$

319  $\xi = (\xi_1^2 + \xi_2^2)^{1/2}$  and expressions for  $\Delta_1$ - $\Delta_4$  are given, respectively, in the Appendix D.

320 From Eq. (22), it can be seen that the variance of the flow velocity is positively  
 321 correlated with the variances of the log-hydraulic conductivity and log-aquifer  
 322 thickness. This means that the variability of the flow velocity field increases with the  
 323 variability of the hydraulic conductivity and aquifer thickness fields.

324

## 325 **4.2 Variance of the solute displacement in the mean flow direction**

326

### 327 **4.2.1 Nonstationary flow fields**

328

329 Substituting Eq. (21) into Eq. (15) and integrating it yields the following expression

330 for the variance of longitudinal solute displacement as

$$331 \quad X_{11}(t) = X_{11\gamma}(t) + X_{11\beta}(t), \quad (23a)$$

332 where

$$333 \quad \frac{X_{11\gamma}(t)}{\sigma_y^2 \lambda_y^2} = \frac{5}{2} - 3\gamma - \frac{9}{\Gamma^2} + 2\Gamma + \frac{3}{8}\Gamma^2 + 3Ei(-\Gamma) - 3\ln(\Gamma) + e^{-\Gamma} \left(2 + \frac{9}{\Gamma^2} + \frac{9}{\Gamma}\right), \quad (23b)$$

$$334 \quad \frac{X_{11\beta}(t)}{\sigma_\beta^2 \lambda_\beta^2} = 4 - 4\gamma - \frac{36}{\mathcal{G}^2} + 2\mathcal{G} + \frac{3}{2}\mathcal{G}^2 + 4Ei(-\mathcal{G}) - 4\ln(\mathcal{G}) + 2e^{-\mathcal{G}} \left(7 + 2\mathcal{G} + \frac{18}{\mathcal{G}^2} + \frac{18}{\mathcal{G}}\right), \quad (23c)$$

$$335 \quad \Gamma = Vt/\lambda_y, \text{ and } \mathcal{G} = Vt/\lambda_\beta.$$

336

#### 337 4.2.2 Stationary flow fields

338

339 Gutjahr and Gelhar (1981) show that the Poission equation in an unbounded porous

340 medium such as equation (B1a) also has a zero-order intrinsic random function (0-IRF)

341 as its solution when the input random process has a finite variance. That is, Eqs. (B1a)

342 and (B1b) with stationary processes  $\gamma$  and  $\beta$  admit the solutions of the form

$$343 \quad h_\gamma(x_1, x_2) = J \int_{-\infty}^{\infty} \int_{-\infty}^{\infty} i_{R_1} \frac{1 - \exp[i(R_1 x_1 + R_2 x_2)]}{R_1^2 + R_2^2} dZ_\gamma(R_1, R_2), \quad (24a)$$

$$344 \quad h_\beta(x_1, x_2) = 2J \int_{-\infty}^{\infty} \int_{-\infty}^{\infty} i_{R_1} \frac{1 - \exp[i(R_1 x_1 + R_2 x_2)]}{R_1^2 + R_2^2} dZ_\beta(R_1, R_2). \quad (24b)$$

345 Using a similar methodology as above and based on Eq. (24), one would arrive at

346 the following results

$$347 \quad C_{y_h}(\xi, \zeta) = \sigma_y^2 \lambda_y J \left[ \Theta_1 \left( \frac{\xi_1}{\lambda_y}, \frac{\xi_2}{\lambda_y} \right) - \Theta_1 \left( \frac{\rho_1}{\lambda_y}, \frac{\rho_2}{\lambda_y} \right) \right], \quad (25a)$$

$$348 \quad C_{y_h}(\xi, \zeta) = \sigma_y^2 \lambda_y J \left[ \Theta_1 \left( \frac{\xi_1}{\lambda_y}, \frac{\xi_2}{\lambda_y} \right) - \Theta_1 \left( \frac{\rho_1}{\lambda_y}, \frac{\rho_2}{\lambda_y} \right) \right], \quad (25b)$$

$$349 \quad \gamma_{h_y}(\xi, \zeta) = \frac{1}{2} \sigma_y^2 \lambda_y^2 J^2 \Psi_1 \left( \frac{\rho_1}{\lambda_y}, \frac{\rho_2}{\lambda_y} \right), \quad (26a)$$

$$350 \quad \gamma_{h_\beta}(\xi, \zeta) = 2 \sigma_\beta^2 \lambda_\beta^2 J^2 \Psi_1 \left( \frac{\rho_1}{\lambda_\beta}, \frac{\rho_2}{\lambda_\beta} \right), \quad (26b)$$

351 from which it follows that in the mean flow direction,

$$352 \quad \langle v_1(\xi_1, \xi_2) v_1(\zeta_1, \zeta_2 = \xi_2) \rangle = \langle v_{y_1}(\xi_1, \xi_2) v_{y_1}(\zeta_1, \xi_2) \rangle + \langle v_{\beta_1}(\xi_1, \xi_2) v_{\beta_1}(\zeta_1, \xi_2) \rangle, \quad (27a)$$

353 where

$$354 \quad \frac{\langle v_{y_1}(\xi_1, \xi_2) v_{y_1}(\zeta_1, \xi_2) \rangle}{V^2} = \sigma_y^2 \left[ \frac{3}{2} \left( -\frac{6}{\varphi^4} + \frac{1}{\varphi^2} \right) + 3e^{-\varphi} \left( \frac{3}{\varphi^4} + \frac{3}{\varphi^3} + \frac{1}{\varphi^2} \right) \right], \quad (27b)$$

$$355 \quad \frac{\langle v_{\beta_1}(\xi_1, \xi_2) v_{\beta_1}(\zeta_1, \xi_2) \rangle}{V^2} = \sigma_\beta^2 \left[ -2 \left( \frac{18}{\nu^4} + \frac{1}{\nu^2} \right) + e^{-\varphi} \left( 1 + \frac{36}{\nu^4} + \frac{36}{\nu^3} + \frac{16}{\nu^2} + \frac{4}{\nu} \right) \right], \quad (27c)$$

356  $\varphi = (\xi_1 - \zeta_1) / \lambda_y$  and  $\nu = (\xi_1 - \zeta_1) / \lambda_\beta$ . Finally, the variance of solute displacement in the

357 mean flow direction is obtained from Eq. (15) by applying Eq. (27):

$$358 \quad X_{11}(t) = X_{11y}(t) + X_{11\beta}(t), \quad (28a)$$

359 where

$$360 \quad \frac{X_{11y}(t)}{\sigma_y^2 \lambda_y^2} = \frac{3}{2} - 3\gamma + 2\Gamma - \frac{3}{\Gamma^2} + 3Ei(-\Gamma) - 3\ln(\Gamma) + 3e^{-\Gamma} \left( \frac{1}{\Gamma^2} + \frac{1}{\Gamma} \right), \quad (28b)$$

$$361 \quad \frac{X_{11\beta}(t)}{\sigma_\beta^2 \lambda_\beta^2} = 4 - 4\gamma - \frac{12}{g^2} + 2g + 4Ei(-g) - 4\ln(g) + 2e^{-g} \left( 1 + \frac{6}{g^2} + \frac{6}{g} \right). \quad (28c)$$

362 Equation (28b) is equivalent to the solution of Dagan (1982; 1984) using the Green

363 function approach, where the variance and integral scale of the log conductivity fields

364 in Eq. (28b) are replaced by the variance and integral scale of the log transmissivity

365 fields.

366 A comparison of the prediction of the solute longitudinal displacement variance  
367 in Eq. (23b) in nonstationary flow fields with the prediction in Eq. (28b) in stationary  
368 flow fields is shown graphically in Fig. 3. The variance of the longitudinal  
369 displacement in response to the change in the hydraulic conductivity grows  
370 monotonically with travel time. It can also be seen that the difference in displacement  
371 variance caused by the nonstationary and stationary flow fields increases with travel  
372 time, which means that the longitudinal macrodispersion in nonstationary flow fields  
373 becomes anomalous and a Fick's regime is not achieved. This behavior of anomalous  
374 macrodispersion is attributed to the effect of nonstationary hydraulic head fields  
375 caused by the variation of hydraulic conductivity.

376

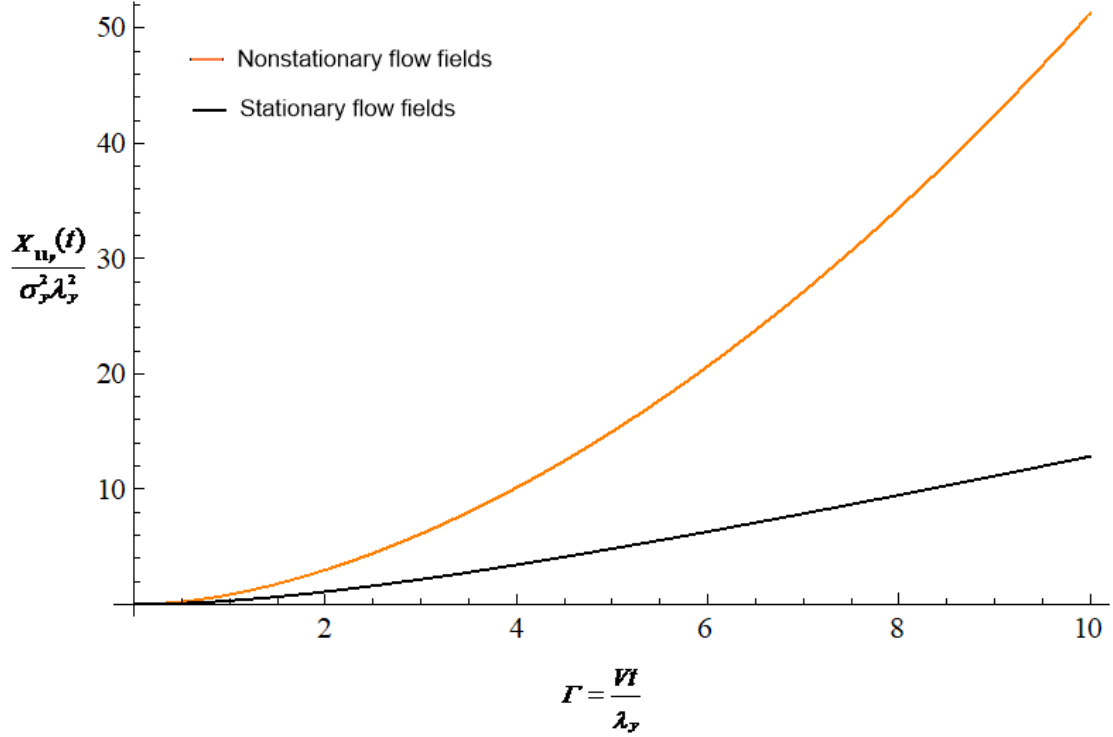

377

378 **Figure 3.** Comparison of the prediction of the solute longitudinal displacement  
 379 variance in Eq. (23b) in nonstationary flow fields with the prediction in Eq. (28b) in  
 380 stationary flow fields.

381 A macrodispersion coefficient in the mean flow direction can be defined by half  
 382 of the time derivative of Eq. (23b) as follows:

$$383 \quad D_{11y}(t) = \sigma_y^2 \lambda_y V \left[ 1 + \frac{9}{\Gamma^3} - \frac{3}{2} \frac{1}{\Gamma} + \frac{3}{8} \Gamma - e^{-\Gamma} \left( 1 + \frac{9}{\Gamma^3} + \frac{9}{\Gamma^2} + \frac{3}{\Gamma} \right) \right]. \quad (29a)$$

384 This implies that the longitudinal macrodispersion coefficient at large time in  
 385 nonstationary flow fields can be approximated as

$$386 \quad D_{11y}(t) \approx \sigma_y^2 \lambda_y V \left( 1 + \frac{3}{8} \Gamma \right). \quad (29b)$$

387 That is, the longitudinal macrodispersion increases linearly with travel time at large  
 388 distances. Note that, in stationary flow fields, the longitudinal macrodispersion  
 389 coefficient approaches an asymptotic limit  $D_{11y} = \sigma_y^2 \lambda_y V$  at large time. Clearly,

390 applying the asymptotic macrodispersion coefficient (Eq. (29b)), which is appropriate  
 391 for macrodispersion in stationary flow fields, to the prediction of macrodispersion in  
 392 the downstream region at a large distance from the contamination source leads to a  
 393 significant underestimation of macrodispersion in nonstationary flow fields.

394 The behavior of the longitudinal displacement variance of solutes, affected by the  
 395 effect of variation of aquifer thickness field, in the nonstationary flow field (Eq. (23c))  
 396 and in the stationary flow field (Eq. (28c)) as a function of travel time is also presented  
 397 graphically in Fig. 4. This again demonstrates that the displacement variance grows  
 398 faster than linear with travel time and the longitudinal macrodispersion becomes  
 399 anomalous at large travel times. The corresponding longitudinal macrodispersion  
 400 coefficient is

$$401 \quad D_{11,p}(t) = \sigma_{\beta}^2 \lambda_{\beta} V \left[ 1 + \frac{36}{g^3} - \frac{2}{g} + \frac{3}{2} g - e^{-g} \left( 5 + \frac{36}{g^3} + \frac{36}{g^2} + \frac{16}{g} + 2g \right) \right], \quad (30a)$$

402 with the approximation at large times as

$$403 \quad D_{11,p}(t) \approx \sigma_{\beta}^2 \lambda_{\beta} V \left( 1 + \frac{3}{2} g \right). \quad (30b)$$

404



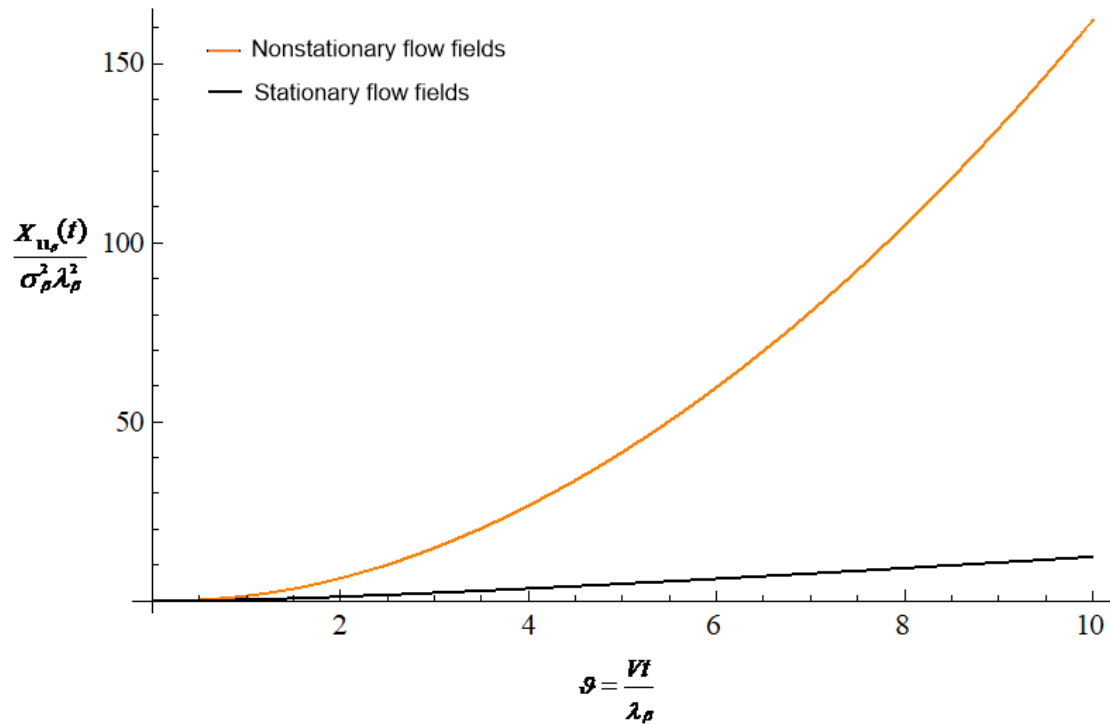

405

406 **Figure 4.** Comparison of the prediction of the solute longitudinal displacement  
 407 variance in Eq. (23c) in nonstationary flow fields with the prediction in Eq. (28c) in  
 408 stationary flow fields.

409

## 410 5 Conclusions

411

412 In this work, a theoretical stochastic methodology is developed to quantify the  
 413 displacement variance of an inert solute particle in heterogeneous confined aquifers  
 414 with variable thickness. This methodology relates solute displacement to the  
 415 Fokker-Planck equation through the two-dimensional depth-averaged solute mass  
 416 conservation equation. In contrast to previous stochastic studies of two-dimensional  
 417 solute transport problems, the variability of solute movement is caused not only by the

418 variability of log conductivity, but also by the variability of log thickness of confined  
419 aquifer.

420 The two-dimensional stochastic groundwater flow equation for the  
421 depth-averaged hydraulic head perturbation always has a 1-IRF solution when the log  
422 hydraulic conductivity and log aquifer thickness fields are second-order stationary.  
423 This leads to an unbounded increasing head semivariogram where no head covariance  
424 exists. The nonstationarity of the hydraulic head leads to nonstationary flow velocity  
425 fields and thus a nonlinear increase in longitudinal solute displacement with travel  
426 time. That is, a Fick's regime is not achieved, and the longitudinal macrodispersion  
427 becomes anomalous and increases linearly with travel time at large distances. It is also  
428 shown that the variability of solute displacement in the mean flow direction increases  
429 with the variability of hydraulic conductivity and aquifer thickness.

430

## 431 **Appendix A: Development of Eq. (2)**

432

433 When the dispersion tensor is expressed in its three principal directions and these  
434 principal directions are used as Cartesian coordinate axes, the equation for the  
435 transport of inert solutes through a rigid, saturated porous medium is (e.g., de Marsily,  
436 1986)

$$437 \quad n \frac{\partial c}{\partial t} = \frac{\partial}{\partial x_i} \left[ D_i \frac{\partial c}{\partial x_i} - c q_i \right] \quad i=1,2,3, \quad (A1)$$

438 where  $n$  is the porosity,  $c$  is the solute concentration, and  $D_i$  and  $q_i$  are the dispersion  
 439 coefficient and the specific discharge in the  $x_i$  direction, respectively. Integrating Eq.  
 440 (A1) with respect to  $x_3$  over the vertical thickness of a confined aquifer,  $B(x_1, x_2)$ ,  
 441 together with Leibniz's rule and no-slip condition for the dispersive and diffusive  
 442 fluxes at upper and lower boundaries of the confined aquifer, yields the  
 443 two-dimensional, depth-averaged equation for conservation of solute mass (e.g., Holly,  
 444 1975; Fischer et al., 1979)

$$445 \quad \frac{\partial}{\partial t} [B\tilde{c}] = \frac{\partial}{\partial x_i} \left[ \frac{\tilde{D}_i}{n} B \frac{\partial \tilde{c}}{\partial x_i} \right] - \frac{\partial}{\partial x_i} \left[ \frac{\tilde{q}_i}{n} B\tilde{c} \right] \quad i=1,2, \quad (A2)$$

446 where  $\tilde{D}_i$ ,  $\tilde{c}$ , and  $\tilde{q}_i$  represent the depth-averaged dispersion coefficient,  
 447 depth-averaged solute concentration, and depth-averaged specific discharge,  
 448 respectively. Note that in developing Eq. (A2), it is assumed that the contaminant  
 449 plume in confined aquifers is well mixed over depth, so that variations around the  
 450 depth-averaged concentration are relatively small (Holly, 1975). Then the average of  
 451 the product of concentration and velocity fluctuations can be assumed to be absorbed  
 452 in the gradient transport terms in Eq. (A2)

453 Starting from the identity,

$$454 \quad \frac{\tilde{D}_i}{n} B \frac{\partial \tilde{c}}{\partial x_i} = \frac{\partial}{\partial x_i} \left[ \frac{\tilde{D}_i}{n} B\tilde{c} \right] - \tilde{c} \frac{\partial}{\partial x_i} \left[ \frac{\tilde{D}_i}{n} B \right]$$

$$455 \quad = \frac{\partial}{\partial x_i} \left[ \frac{\tilde{D}_i}{n} B\tilde{c} \right] - B\tilde{c} \frac{1}{n} \frac{\partial \tilde{D}_i}{\partial x_i} - \frac{\tilde{D}_i}{n} B\tilde{c} \frac{\partial \ln B}{\partial x_i} \quad i=1,2, \quad (A3)$$

456 Eq. (A2) can be rewritten as follows:

$$457 \quad \frac{\partial}{\partial t}[B\tilde{c}] = \frac{\partial^2}{\partial x_i^2} \left[ \frac{\tilde{D}_i}{n} B\tilde{c} \right] - \frac{\partial}{\partial x_i} \left[ \left( \frac{1}{n} \frac{\partial \tilde{D}_i}{\partial x_i} + \frac{\tilde{D}_i}{n} \frac{\partial \ln B}{\partial x_i} + \frac{\tilde{q}_i}{n} \right) B\tilde{c} \right] \quad i=1,2, \quad (\text{A4})$$

458 which corresponds to the form of the Fokker-Planck equation (e.g., Risken, 1989).

459 The concentration field associated with the solute particle can be written as  
 460 (Fischer et al., 1979; Dagan, 1989)

$$461 \quad B\tilde{c} = \frac{M}{n} f(\mathbf{x}; t, \mathbf{a}, t_0), \quad (\text{A5})$$

462 where  $M$  is the solute mass,  $f(\mathbf{x}; t, \mathbf{a}, t_0)$  stands for the probability density function of the  
 463 particle displacement which originates at  $\mathbf{x} = \mathbf{a}$  for  $t = t_0$ . Substituting Eq. (A5) into Eq.

464 (A4) gives

$$465 \quad \frac{\partial}{\partial t} f(\mathbf{x}; t) = \frac{\partial^2}{\partial x_i^2} \left[ \frac{\tilde{D}_i}{n} f(\mathbf{x}; t) \right] - \frac{\partial}{\partial x_i} \left[ \left( \frac{1}{n} \frac{\partial \tilde{D}_i}{\partial x_i} + \frac{\tilde{D}_i}{n} \frac{\partial \ln B}{\partial x_i} + \frac{\tilde{q}_i}{n} \right) f(\mathbf{x}; t) \right] \quad i=1,2, \quad (\text{A6})$$

466 which is known as the Fokker-Planck equation. Moreover, it can be shown that the  
 467 stochastic differential equation for the evolution of stochastic process (e.g., Van  
 468 Kampen, 1992; Jing et al., 2019)

$$469 \quad \frac{dX_i}{dt} = \mu_i(X(t)) + \sigma_i(X(t)) \frac{dW}{dt} \quad i=1,2, \quad (\text{A7})$$

470 where  $X(= (X_1, X_2))$  is the displacement,  $\mu_i$  is the drift coefficient,  $\sigma_i$  is the diffusion  
 471 coefficient, and  $W$  denotes a Wiener process, is equivalent to the Fokker-Planck

472 equation (A6) such that

$$473 \quad \mu_i = \frac{1}{n} \frac{\partial}{\partial x_i} \tilde{D}_i(X) + \frac{1}{n} \tilde{D}_i(X) \frac{\partial}{\partial x_i} \ln B(X) + \frac{1}{n} \tilde{q}_i(X) \quad i=1,2, \quad (\text{A8a})$$

$$474 \quad \sigma_i^2 = \frac{2}{n} \tilde{D}_i(X) \quad i=1,2, \quad (\text{A8b})$$

475 Using Eq. (A8), Eq. (A7) leads to Eq. (2).

476

## 477 **Appendix B: Derivations of Eq. (18) to Eq. (20)**

478

479 Due to the property of the linearity of the driving forces, Eq. (10b) can alternatively

480 be divided into two parts as

$$481 \quad \frac{\partial^2 h_y}{\partial x_i^2} = J \frac{\partial y}{\partial x_1} \quad i=1,2, \quad (\text{B1a})$$

$$482 \quad \frac{\partial^2 h_\beta}{\partial x_i^2} = 2J \frac{\partial \beta}{\partial x_1} \quad i=1,2, \quad (\text{B1b})$$

483 where  $h = h_y + h_\beta$ . Matheron (1973) shows that if the random input process of the

484 Poisson equation is second-order stationary, then the Poisson equation has a

485 first-order intrinsic random function (1-IRF) as its solution. Since the processes  $y$  and

486  $\beta$  are second-order stationary, it can be shown that the derivatives of the processes  $y$

487 and  $\beta$  with respect to  $x_1$  are also stationary. This means that Eq. (B1) has a 1-IRF

488 solution for  $h_y$  and  $h_\beta$  which admits the Fourier-Stieltjes representation as follows:

$$489 \quad h_y(x_1, x_2) = J \int_{-\infty}^{\infty} \int_{-\infty}^{\infty} i R_1 \frac{1 - \exp[i(R_1 x_1 + R_2 x_2)] + i(R_1 x_1 + R_2 x_2)}{R_1^2 + R_2^2} dZ_y(R_1, R_2), \quad (\text{B2a})$$

$$490 \quad h_\beta(x_1, x_2) = 2J \int_{-\infty}^{\infty} \int_{-\infty}^{\infty} i R_1 \frac{1 - \exp[i(R_1 x_1 + R_2 x_2)] + i(R_1 x_1 + R_2 x_2)}{R_1^2 + R_2^2} dZ_\beta(R_1, R_2). \quad (\text{B2b})$$

491 where  $R_1$  and  $R_2$  are the components of the wave number vector  $\mathbf{R} (= (R_1, R_2))$ , and  $Z_y$

492 and  $Z_\beta$  are complex-valued distributions with uncorrelated increments on wave  
 493 number space. Note that a 1-IRF is the second integral of a zero-mean spatial random  
 494 function (Chile's and Delfiner, 1999).

495 The stationarity of the  $\ln K$  process allows the Fourier-Stieltjes representations  
 496 (e.g., Lumley and Panofsky, 1964)

$$497 \quad y(x_1, x_2) = \int_{-\infty}^{\infty} \int_{-\infty}^{\infty} \exp[i(R_1 x_1 + R_2 x_2)] dZ_y(R_1, R_2). \quad (\text{B3})$$

498 Using this and Eqs. (B2a) and (24a), the covariance of  $\ln K$  process with the head  
 499 process  $C_{yh}$  in Eq. (12) is given as

$$500 \quad C_{yh_y}(\xi, \zeta) = \langle y(\xi) h_y(\zeta) \rangle$$

$$501 \quad = -J \int_{-\infty}^{\infty} \int_{-\infty}^{\infty} i \frac{R_1}{R_1^2 + R_2^2} \exp[i(R_1 \xi_1 + R_2 \xi_2)] \{1 - \exp[-i(R_1 \zeta_1 + R_2 \zeta_2)] - i(R_1 \zeta_1 + R_2 \zeta_2)\}$$

$$502 \quad \times \frac{\sigma_y^2 \lambda_y^2}{2\pi [1 + \lambda_y^2 (R_1^2 + R_2^2)]^{3/2}} dR_1 dR_2$$

$$503 \quad = \sigma_y^2 \lambda_y J \left[ \Theta_1\left(\frac{\xi_1}{\lambda_y}, \frac{\xi_2}{\lambda_y}\right) - \frac{\zeta_1}{\lambda_y} \Theta_2\left(\frac{\xi_1}{\lambda_y}, \frac{\xi_2}{\lambda_y}\right) + \frac{\zeta_2}{\lambda_y} \Theta_3\left(\frac{\xi_1}{\lambda_y}, \frac{\xi_2}{\lambda_y}\right) - \Theta_1\left(\frac{\rho_1}{\lambda_y}, \frac{\rho_2}{\lambda_y}\right) \right], \quad (\text{B4})$$

504 where  $\rho_1 = \xi_1 - \zeta_1$ ,  $\rho_2 = \xi_2 - \zeta_2$ , and

$$505 \quad \Theta_1(a, b) = \frac{a}{r} [1 - e^{-r(1+r)}], \quad (\text{B5a})$$

$$506 \quad \Theta_2(a, b) = -2 \frac{a^2}{r^4} + \frac{1}{r^2} + e^{-r} \left[ a^2 \left( \frac{2}{r^4} + \frac{2}{r^3} + \frac{1}{r^2} \right) - \frac{1}{r^2} - \frac{1}{r} \right], \quad (\text{B5b})$$

$$507 \quad \Theta_3(a, b) = ab \left[ \frac{2}{r^4} - e^{-r} \left( \frac{2}{r^4} + \frac{2}{r^3} + \frac{1}{r^2} \right) \right], \quad (\text{B5c})$$

$$508 \quad r^2 = a^2 + b^2.$$

509 Similarly, the closed-form expression for the covariance of  $\ln B$  process with the  
510 head process  $C_{\beta h_\beta}$  in Eq. (12) can be obtained using Eqs. (B2b), (24b), and the  
511 Fourier-Stieltjes representations for the stationary  $\ln B$  process

$$512 \quad \beta(x_1, x_2) = \int_{-\infty}^{\infty} \int_{-\infty}^{\infty} \exp[i(R_1 x_1 + R_2 x_2)] dZ_\beta(R_1, R_2), \quad (B6)$$

513 which is in the form

$$514 \quad C_{\beta h_\beta}(\xi, \zeta) = \langle \beta(\xi) h_\beta(\zeta) \rangle$$

$$515 \quad = 2\sigma_y^2 \lambda_\beta J \left[ \Theta_1\left(\frac{\xi_1}{\lambda_\beta}, \frac{\xi_2}{\lambda_\beta}\right) - \frac{\zeta_1}{\lambda_\beta} \Theta_2\left(\frac{\xi_1}{\lambda_\beta}, \frac{\xi_2}{\lambda_\beta}\right) + \frac{\zeta_2}{\lambda_\beta} \Theta_3\left(\frac{\xi_1}{\lambda_\beta}, \frac{\xi_2}{\lambda_\beta}\right) - \Theta_1\left(\frac{\rho_1}{\lambda_\beta}, \frac{\rho_2}{\lambda_\beta}\right) \right]. \quad (B7)$$

516 Substituting Eq. (B2) into Eq. (13), it is found that the semivariogram of the head  
517 process has the following form

$$518 \quad \gamma_{h_y}(\xi, \zeta) = \frac{1}{2} \sigma_y^2 \lambda_y^2 J^2 \left\{ \frac{3\rho_1^2}{8\lambda_y^2} + \frac{1\rho_2^2}{8\lambda_y^2} + \Psi_1\left(\frac{\rho_1}{\lambda_y}, \frac{\rho_2}{\lambda_y}\right) + \frac{\rho_1}{\lambda_y} \left[ -\frac{\xi_1}{\lambda_y} \Psi_2\left(\frac{\xi_1}{\lambda_y}, \frac{\xi_2}{\lambda_y}\right) + \frac{\zeta_1}{\lambda_y} \Psi_2\left(\frac{\zeta_1}{\lambda_y}, \frac{\zeta_2}{\lambda_y}\right) \right] \right.$$

$$519 \quad \left. + \frac{\rho_2}{\lambda_y} \left[ \frac{\xi_2}{\lambda_y} \Psi_3\left(\frac{\xi_1}{\lambda_y}, \frac{\xi_2}{\lambda_y}\right) - \frac{\zeta_2}{\lambda_y} \Psi_3\left(\frac{\zeta_1}{\lambda_y}, \frac{\zeta_2}{\lambda_y}\right) \right] \right\}, \quad (B8a)$$

$$520 \quad \gamma_{h_\beta}(\xi, \zeta) = 2\sigma_\beta^2 \lambda_\beta^2 J^2 \left\{ \frac{3\rho_1^2}{8\lambda_\beta^2} + \frac{1\rho_2^2}{8\lambda_\beta^2} + \Psi_1\left(\frac{\rho_1}{\lambda_\beta}, \frac{\rho_2}{\lambda_\beta}\right) + \frac{\rho_1}{\lambda_\beta} \left[ -\frac{\xi_1}{\lambda_\beta} \Psi_2\left(\frac{\xi_1}{\lambda_\beta}, \frac{\xi_2}{\lambda_\beta}\right) + \frac{\zeta_1}{\lambda_\beta} \Psi_2\left(\frac{\zeta_1}{\lambda_\beta}, \frac{\zeta_2}{\lambda_\beta}\right) \right] \right.$$

$$521 \quad \left. + \frac{\rho_2}{\lambda_\beta} \left[ \frac{\xi_2}{\lambda_\beta} \Psi_3\left(\frac{\xi_1}{\lambda_\beta}, \frac{\xi_2}{\lambda_\beta}\right) - \frac{\zeta_2}{\lambda_\beta} \Psi_3\left(\frac{\zeta_1}{\lambda_\beta}, \frac{\zeta_2}{\lambda_\beta}\right) \right] \right\}, \quad (B8b)$$

522 where

$$523 \quad \Psi_1(a, b) = \frac{a^2 - b^2}{r^2} \left[ \frac{1}{2} + \frac{e^{-r}(r^2 + 3r + 3) - 3}{r^2} \right] - Ei(r) + \ln(r) + e^{-r} - 1 + \gamma, \quad (B9a)$$

$$524 \quad \Psi_2(a, b) = \frac{1}{r^6} (a^4 + 6a^2 + 4a^2 b^2 + 3b^4 - 18b^2) + e^{-r} \left[ -2\frac{a^6}{r^7} - a^4 \left( \frac{6}{r^7} + \frac{4}{r^6} \right) - 6\frac{a^2}{r^6} - 4\frac{a^4 b^2}{r^7} \right.$$

$$525 \quad \left. + 2a^2 b^2 \left( \frac{6}{r^7} + \frac{1}{r^6} \right) - 2\frac{a^2 b^4}{r^7} + 6b^4 \left( \frac{3}{r^7} + \frac{1}{r^6} \right) + 18\frac{b^2}{r^6} \right], \quad (B9b)$$

$$526 \quad \Psi_3(a, b) = \frac{1}{r^6} (a^4 - 18a^2 - b^4 + 6b^2) + e^{-r} \left[ 2\frac{a^6}{r^7} + 2a^4 \left( \frac{9}{r^7} + \frac{4}{r^6} \right) + 18\frac{a^2}{r^6} + 4\frac{a^4 b^2}{r^7} \right]$$

$$527 \quad +2\frac{a^2b^4}{r^7} + 6a^2b^2\left(\frac{2}{r^7} + \frac{1}{r^6}\right) - 2b^4\left(\frac{3}{r^7} + \frac{1}{r^6}\right) - 6\frac{b^2}{r^6}], \quad (\text{B9c})$$

528  $r^2 = a^2 + b^2$ ,  $Ei$  is the exponential integral, and  $\gamma$  is the Euler constant.

529

### 530 **Appendix C: Expressions for the functions in Eq. (21)**

531

$$532 \quad \Xi_1(a, b) = -2\frac{9}{r^4} + \frac{1}{r^2} + e^{-r}\left[a^2\left(\frac{2}{r^4} + \frac{2}{r^3} + \frac{1}{r^2}\right) - \frac{1}{r^2} - \frac{1}{r}\right], \quad (\text{C1})$$

$$533 \quad \Xi_2(a, b) = -\frac{1}{2}\frac{1}{r^8}\Omega_1 + \frac{e^{-r}}{r^9}\Omega_2 + \frac{e^{-r}}{r^8}\Omega_3, \quad (\text{C2})$$

534 where  $r = (a^2 + b^2)^{1/2}$ ,

$$535 \quad \Omega_1(a, b) = a^6 + 3a^2b^2(-36 + b^2) - 3b^4(-6 + b^2) + a^4(18 + 7b^2), \quad (\text{C3})$$

$$536 \quad \Omega_2(a, b) = 2a^8 + 9b^6 + a^6(9 - 2b^2) - 5a^4b^2(9 + 2b^2) - 3a^2b^4(15 + 2b^2), \quad (\text{C4})$$

$$537 \quad \Omega_3(a, b) = a^8 + 3b^4(3 + b^2) + a^6(5 + 2b^2) - 3a^2b^2(18 + 7b^2) + b^4(9 - 19b^2 + b^4), \quad (\text{C5})$$

538

### 539 **Appendix D: Expressions for the functions in Eq. (22)**

540

$$541 \quad \Delta_1(a, b) = 3a^8 + 4a^6(-1 + 3b^2) + b^4(72 - 4b^2 + 3b^4) + 4a^2b^4(-108 + 5b^2 + 3b^4) + 2a^4(36 + 10b^2 + 9b^4), \quad (\text{D1})$$

$$542 \quad \Delta_2(a, b) = -8a^8 + 4a^6[-18 - 8r + (8 + 2r)3b^2] + b^4[-72r - 4(8 + 8r)b^2 - 8b^4]$$

$$543 \quad + 4a^2b^2[108r + 5(18 + 8r)b^2 + (8 + 2r)b^4] + 2a^4[-36r + 10(18 + 8r)b^2 + (40 + 8r)b^4], \quad (\text{D2})$$

$$544 \quad \Delta_3(a, b) = a^8 + 4a^6b^2 + b^4(144 - 16b^2 + b^4) + 4a^2b^4(-216 + 8b^2 + b^4) + 6a^4(24 + 8b^2 + b^4), \quad (\text{D3})$$

$$545 \quad \Delta_4(a, b) = -8(3 + r)a^8 + 4a^6[-18(2 + r) + (12 - 2r)b^2] + b^4[-144r - 8(18 + 7r)b^2 - 8b^4]$$



546 
$$+4a^2b^2[216r+2(90+41r)b^2+(20+2r)b^4]+2a^4[-72r+12(30+13r)b^2+(80+4r)b^4], \quad (D4)$$

547 where  $r = (a^2+b^2)^{1/2}$ .

548

549 *Data availability.* No data was used for the research described in the article.

550

551 *Author contributions.* C-MC: Conceptualization, Methodology, Formal analysis,  
552 Writing - original draft preparation, Writing - review & editing.

553 C-FN: Conceptualization, Methodology, Formal analysis, Writing - original draft  
554 preparation, Writing - review & editing, Supervision, Funding acquisition.

555 C-PL: Conceptualization, Methodology, Formal analysis, Writing - original draft  
556 preparation, Writing - review & editing.

557 I-HL: Conceptualization, Methodology, Formal analysis, Writing - original draft  
558 preparation, Writing - review & editing.

559

560 *Competing interests.* The authors declare that they have no conflict of interest.

561

562 *Acknowledgements.* Research leading to this paper has been partially supported by the  
563 grant from the Taiwan Ministry of Science and Technology under the grants MOST

564 108-2638-E-008-001-MY2, MOST 110-2123-M-008-001-, MOST

565 110-2621-M-008-003-, and MOST 110-2811-M-008-533. We are grateful to the

566 Editor Prof. Monica Riva and anonymous referees for constructive comments that

567 improved the quality of the work.

568

569 **References**

570

571 Bailey, R. T. and Baù, D.: Estimating geostatistical parameters and spatially-variable

572 hydraulic conductivity within a catchment system using an ensemble smoother,

573 *Hydrol. Earth Syst. Sci.*, 16(2), 287-304, 2012.

574 Bear, J.: *Hydraulics of groundwater*, McGraw-Hill, New York, 1979.

575 Bear, J. and Cheng, A.H.-D.: *Modeling groundwater flow and contaminant transport*,

576 Springer, Dordrecht, 2010.

577 Butera I. and Tanda, M.: Solute transport analysis through heterogeneous media in

578 nonuniform in the average flow by a stochastic approach, *Transp. Porous Media*,

579 36(3), 255-291, 1999.

580 Butera, I., Cotto, I., and Ostorero, V.: A geostatistical approach to the estimation of a

581 solute trajectory through porous formations, *J. Hydrol.*, 375(3-4), 345-355, 2009.

582 Chang, C-M, Ni, C-F, Li, W-C, Lin, C-P, and Lee, I-H: Stochastic analysis of the

583 variability of groundwater flow fields in heterogeneous confined aquifers of

584 variable thickness, *Stoch. Environ. Res. Risk Assess.*,

585 <https://doi.org/10.1007/s00477-021-02125-7>, 2021.

586 Chile`s, J. P. and Delfiner, P.: *Geostatistics: modeling spatial uncertainty*, 1<sup>st</sup> ed.,

587 Wiley-Interscience, New York, 1999.

588 Ciriello, V. and Barros, F. P. J.: Characterizing the influence of multiple uncertainties  
589 on predictions of contaminant discharge in groundwater within a Lagrangian  
590 stochastic formulation, *Water Resour. Res.*, 56(10), doi:10.1029/2020wr027867,  
591 2020.

592 Cuello, J. E. and Guarracino, L.: Tide-induced head fluctuations in coastal aquifers of  
593 variable thickness, *Hydrol. Process.*, 34, 4139-4146, 2020.

594 Cvetkovic, V., Fiori, A., and Dagan, G.: Tracer travel and residence time distributions  
595 in highly heterogeneous aquifers: Coupled effect of flow variability and mass  
596 transfer, *J. Hydrol.*, 543(Part A), 101-108, 2016.

597 Dagan, G.: Stochastic modeling of groundwater flow by unconditional and conditional  
598 probabilities: 2. The solute transport, *Water Resour. Res.*, 18(4), 835-848, 1982.

599 Dagan, G.: Solute transport in heterogeneous porous formation, *J. Fluid Mech.*, 145,  
600 151-177, 1984.

601 Dagan, G.: *Flow and transport in porous formations*, Springer, New York, 1989.

602 de Marsily, G.: *Quantitative hydrogeology: Groundwater hydrology for engineers*,  
603 Academic Press, Orlando, FL, 1986.

604 DeSimone, L. A., Pope, J. P., and Ransom, K. M.: Machine-learning models to map  
605 pH and redox conditions in groundwater in a layered aquifer system, Northern  
606 Atlantic Coastal Plain, eastern USA, *J. Hydrol. Reg. Stud.*, 30, 100697, 2020.

607 Fischer, H. B., List, E. J., Koh, R., Imberger, J., and Brooks, N.: Mixing in inland and  
608 coastal waters, Academic, San Diego, 1979.

609 Gelhar, L. W.: Stochastic Subsurface Hydrology, Prentice Hall, Englewood Cliffs,  
610 New Jersey, 1993.

611 Guadagnini, A. and Neuman, S. P.: Nonlocal and localized analyses of conditional  
612 mean steady state flow in bounded, randomly nonuniform domains: 2.  
613 Computational examples, Water Resour. Res., 35, 3019-3039, 1999.

614 Gutjahr, A. L. and Gelhar, L. W.: Stochastic models of subsurface flow: infinite versus  
615 finite domains and stationarity, Water Resour. Res., 17(2), 337-350, 1981.

616 Hantush, M. S.: Flow of ground water in sands of nonuniform thickness, part 3. Flow to  
617 wells, J. Geophys. Res., 67(4), 1527-1534, 1962.

618 Holly, F. M. JR.: Two-dimensional mass dispersion in rivers, Hydrology Papers, No.  
619 78., Colorado State University, Fort Collins, 1975.

620 Jing, M., Heße, F., Kumar, R., Kolditz, O., Kalbacher, T., and Attinger, S.: Influence  
621 of input and parameter uncertainty on the prediction of catchment-scale  
622 groundwater travel time distributions, Hydrol. Earth Syst. Sci., 23(1), 171-190,  
623 2019.

624 Lumley J. L. and Panofsky, H. A.: The structure of atmospheric turbulence, John  
625 Wiley, New York, 1964.

626 Masterson, J. P, Pope, J. P., Monti, J., Nardi, M. R., Finkelstein, J. S., and McCoy, K.  
627 J.: Hydrogeology and hydrologic conditions of the Northern Atlantic Coastal  
628 Plain aquifer system from Long Island, New York, to North Carolina, US Geol.  
629 Surv. Sci. Invest Rep., 2013-5133, 2013.

630 Matheron, G.: The intrinsic random functions and their applications, Adv. Appl.  
631 Probab., 5(3), 439-468, 1973.

632 Risken, H.: The Fokker-Planck equation, Springer, New York, 1989.

633 Rubin, Y. and Bellin, A.: The effects of recharge on flow nonuniformity and  
634 macrodispersion, Water Resour. Res., 30(4), 939-948, 1994.

635 Rubin, Y.: Applied Stochastic Hydrogeology, Oxford University Press, New York,  
636 2003.

637 Van Kampen, N. G.: Stochastic processes in physics and chemistry, North-Holland,  
638 Amsterdam, 1992.

639 Zamrsky, D., Oude Essink, G. H., and Bierkens, M. F.: Estimating the thickness of  
640 unconsolidated coastal aquifers along the global coastline, Earth Syst. Sci. Data,  
641 10(3), 1591-1603, 2018.

642 Zhang, D. and Winter, C. L.: Moment equation approach to single phase fluid flow in  
643 heterogeneous reservoirs, Soc. Petrol Eng. J., 4, 118-127, 1999.

644
